# Supplementary material
Source: HighWire-hosted journal article supplement (https://www.cfp.ca/highwire/filestream/37360/field_highwire_adjunct_files/0/Appendix_1_Quality_Appraisal_Results_Tables.pdf)
Supplement: Appendix_1_Quality_Appraisal_Results_Tables.pdf [file Appendix_1_Quality_Appraisal_Results_Tables.pdf]

## Appendix A:

### Table 1. Quality Appraisal Results for Included Studies: Cross-Sectional Studies (AXIS)

| Appraisal Items                                                                                                                                   | Ferrante et al., 2009 | Balduf et al., 2007 | Jung et al., 2016 | Sansone et al., 2007 | Stolberg et al., 2017 | Auspitz et al., 2016 | Salinas et al., 2015 | Sarwer et al., 2012 | Major et al., 2016 | Al-Namash et al., 2011 | Tork et al., 2015 | Martini et al., 2018 | Giaro et al., 2012 | Avidor et al., 2007 | Perlman et al., 2007 |   |
|---------------------------------------------------------------------------------------------------------------------------------------------------|-----------------------|---------------------|-------------------|----------------------|-----------------------|----------------------|----------------------|---------------------|--------------------|------------------------|-------------------|----------------------|--------------------|---------------------|----------------------|---|
| <b>Introduction</b>                                                                                                                               |                       |                     |                   |                      |                       |                      |                      |                     |                    |                        |                   |                      |                    |                     |                      |   |
| Clear aims/objectives of the study                                                                                                                | Y                     | Y                   | Y                 | Y                    | Y                     | Y                    | Y                    | Y                   | Y                  | Y                      | Y                 | Y                    | Y                  | Y                   | Y                    | Y |
| <b>Methods</b>                                                                                                                                    |                       |                     |                   |                      |                       |                      |                      |                     |                    |                        |                   |                      |                    |                     |                      |   |
| Study design appropriate for stated aim(s)                                                                                                        | Y                     | Y                   | Y                 | Y                    | Y                     | Y                    | Y                    | Y                   | Y                  | Y                      | Y                 | Y                    | Y                  | Y                   | Y                    | Y |
| Sample size justification                                                                                                                         | Y                     | N                   | N                 | Y                    | N                     | N                    | Y                    | Y                   | Y                  | N                      | N                 | N                    | N                  | N                   | N                    | N |
| Clear definition of target/reference population                                                                                                   | Y                     | Y                   | Y                 | Y                    | Y                     | Y                    | Y                    | Y                   | Y                  | Y                      | Y                 | Y                    | Y                  | N                   | Y                    | N |
| Sample representative of target/reference population under investigation                                                                          | Y                     | Y                   | Y                 | Y                    | Y                     | Y                    | Y                    | Y                   | Y                  | Y                      | N                 | N                    | N                  | N                   | N                    | Y |
| Selection process likely to select participants that are representative of target/reference population                                            | Y                     | Y                   | Y                 | Y                    | Y                     | Y                    | Y                    | Y                   | N                  | Y                      | N                 | N                    | Y                  | N                   | Y                    | Y |
| Measures were taken to address and categorize non-responders                                                                                      | Y                     | Y                   | N                 | N                    | Y                     | N                    | N                    | N                   | N                  | N                      | N                 | N                    | N                  | N                   | N                    | N |
| Risk factor and outcome variables measured are appropriate to the aims of the study                                                               | Y                     | Y                   | Y                 | Y                    | Y                     | Y                    | Y                    | Y                   | Y                  | Y                      | Y                 | Y                    | Y                  | Y                   | Y                    | Y |
| Risk factor and outcome variables are measured correctly using instruments/measurements that have been trialled, piloted, or published previously | Y                     | Y                   | Y                 | n/a                  | Y                     | Y                    | N                    | n/a                 | n/a                | N                      | Y                 | Y                    | n/a                | Y                   | N                    | N |
| Clear determination of statistical significance and/or precision estimates (ie. p-values, confidence intervals)                                   | Y                     | Y                   | Y                 | Y                    | N                     | Y                    | Y                    | Y                   | n/a                | Y                      | N                 | Y                    | n/a                | N                   | N                    | N |
| Methods (including statistical methods) sufficiently described to enable them to be repeated                                                      | Y                     | Y                   | Y                 | Y                    | Y                     | Y                    | Y                    | Y                   | Y                  | Y                      | Y                 | N                    | Y                  | N                   | N                    | N |
| <b>Results</b>                                                                                                                                    |                       |                     |                   |                      |                       |                      |                      |                     |                    |                        |                   |                      |                    |                     |                      |   |
| Basic data adequately described                                                                                                                   | Y                     | Y                   | Y                 | Y                    | Y                     | Y                    | Y                    | Y                   | Y                  | Y                      | Y                 | Y                    | N                  | Y                   | Y                    | Y |
| Concerns about non-response bias based on response rate                                                                                           | N                     | N                   | Y                 | Y                    | N                     | Y                    | N                    | Y                   | N                  | N                      | N                 | Y                    | Y                  | N                   | Y                    | Y |
| Description of non-responders                                                                                                                     | Y                     | Y                   | N                 | N                    | Y                     | N                    | N                    | N                   | N                  | N                      | N                 | N                    | N                  | N                   | N                    | N |
| Consistent internal results                                                                                                                       | Y                     | Y                   | Y                 | Y                    | Y                     | Y                    | Y                    | Y                   | Y                  | Y                      | Y                 | Y                    | Y                  | Y                   | Y                    | Y |
| Results presented for all analyses described in the methods                                                                                       | Y                     | Y                   | Y                 | Y                    | Y                     | Y                    | Y                    | Y                   | Y                  | Y                      | Y                 | N                    | Y                  | Y                   | Y                    | Y |
| <b>Discussion</b>                                                                                                                                 |                       |                     |                   |                      |                       |                      |                      |                     |                    |                        |                   |                      |                    |                     |                      |   |
| Authors' discussion and conclusions justified by the results                                                                                      | Y                     | Y                   | Y                 | Y                    | Y                     | Y                    | Y                    | Y                   | Y                  | Y                      | Y                 | Y                    | Y                  | Y                   | Y                    | Y |
| Limitations of the study are discussed                                                                                                            | Y                     | Y                   | Y                 | Y                    | Y                     | Y                    | Y                    | Y                   | N                  | N                      | Y                 | Y                    | N                  | Y                   | N                    | N |
| <b>Other</b>                                                                                                                                      |                       |                     |                   |                      |                       |                      |                      |                     |                    |                        |                   |                      |                    |                     |                      |   |
| Funding sources or conflicts of interest that may affect authors' interpretation of the results are declared                                      | N                     | N                   | N                 | N                    | N                     | N                    | Y                    | Y                   | N                  | N                      | N                 | N                    | n/a                | Y                   | N                    | N |
| Ethical approval/consent is contained from participants                                                                                           | Y                     | Y                   | Y                 | Y                    | Y                     | Y                    | N                    | N                   | Y                  | Y                      | Y                 | Y                    | N                  | N                   | N                    | N |

### Table 2. Quality Appraisal Results for Included Studies: Qualitative Studies (CASP)

| Appraisal Items                                                                    | Funk et al. (2016) | Jose et al. (2017) | Kim et al. (2015) |
|------------------------------------------------------------------------------------|--------------------|--------------------|-------------------|
| Clear statement of the research aim                                                | Y                  | Y                  | Y                 |
| Appropriate qualitative methodology                                                | Y                  | Y                  | Y                 |
| Research design appropriate to address the research aims                           | Y                  | Y                  | Y                 |
| Recruitment strategy appropriate to the research aims                              | Y                  | Y                  | Y                 |
| Data collection address the research issue                                         | Y                  | Y                  | Y                 |
| Adequate consideration of the relationship between the researcher and participants | Y                  | Y                  | Y                 |
| Ethical issues have been considered                                                | Y                  | Y                  | Y                 |
| Sufficiently rigorous data analysis                                                | Y                  | Y                  | Y                 |
| Clear statement of findings                                                        | Y                  | Y                  | Y                 |
| Value of research                                                                  | -                  | -                  | -                 |
